# Supplementary material for: Lithium-Ion Charged Polymer Channels Flattening Lithium Metal Anode
Source: PubMed Central journal article supplement (PMC10774241; doi:10.1007/s40820-023-01300-5), 2024-01-08
Supplement: 40820_2023_1300_MOESM1_ESM.pdf [file 40820_2023_1300_MOESM1_ESM.pdf]

Supporting Information for

## Lithium-Ion Charged Polymer Channels Flattening Lithium Metal Anode

Haofan Duan<sup>1,#</sup>, Yu You<sup>1,#</sup>, Gang Wang<sup>1,\*</sup>, Xiangze Ou<sup>1</sup>, Jin Wen<sup>1</sup>, Qiao Huang<sup>1</sup>, Pengbo Lyu<sup>1</sup>, Yaru Liang<sup>1,\*</sup>, Qingyu Li<sup>2</sup>, Jianyu Huang<sup>1</sup>, Yun-Xiao Wang<sup>3</sup>, Hua-Kun Liu<sup>3,4</sup>, Shi Xue Dou<sup>3,4</sup>, Wei-Hong Lai<sup>3,\*</sup>

<sup>1</sup>Hunan Provincial Key laboratory of Thin Film Materials and Devices, School of Material Sciences and Engineering, Xiangtan University, Xiangtan 411105, P. R. China

<sup>2</sup>Guangxi Key Laboratory of Low Carbon Energy Materials, School of Chemical and Pharmaceutical Science, Guangxi Normal University, Guilin 541004, P. R. China

<sup>3</sup>Institute for Superconducting & Electronic Materials, Australian Institute of Innovative Materials, University of Wollongong, Innovation Campus, Squires Way, North Wollongong, NSW 2500, Australia

<sup>4</sup>Institute of Energy Materials Science, University of Shanghai for Science and Technology, Shanghai 200093, P. R. China

#Haofan Duan and Yu You contributed equally to this work.

\*Corresponding authors. E-mail: [esgwang@xtu.edu.cn](mailto:esgwang@xtu.edu.cn) (Gang Wang); [yaruliang@xtu.edu.cn](mailto:yaruliang@xtu.edu.cn) (Yaru Liang); [weihongl@uow.edu.au](mailto:weihongl@uow.edu.au) (Wei-Hong Lai)

### Supplementary Figures and Tables

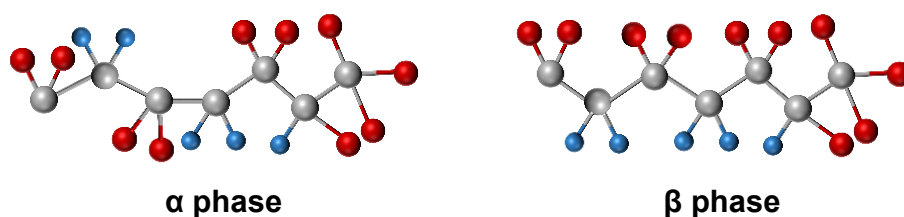

**Fig. S1** Diagrams of the chain conformation for  $\alpha$  and  $\beta$  crystalline phases of PVDF-HFP

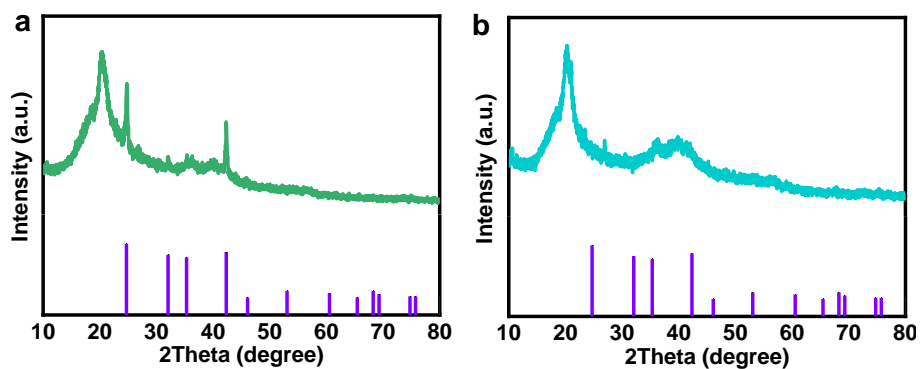

**Fig. S2** XRD patterns of PHL with mass ratios of **a** 1:1 and **b** 1:5

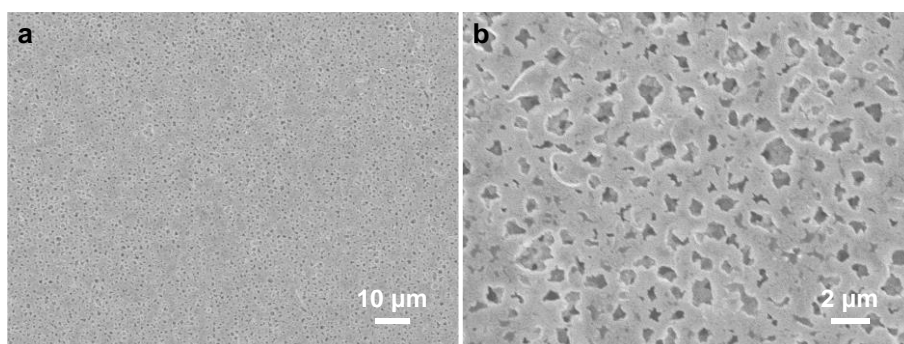

**Fig. S3** SEM images of the pure PVDF-HFP (PH) at different magnifications

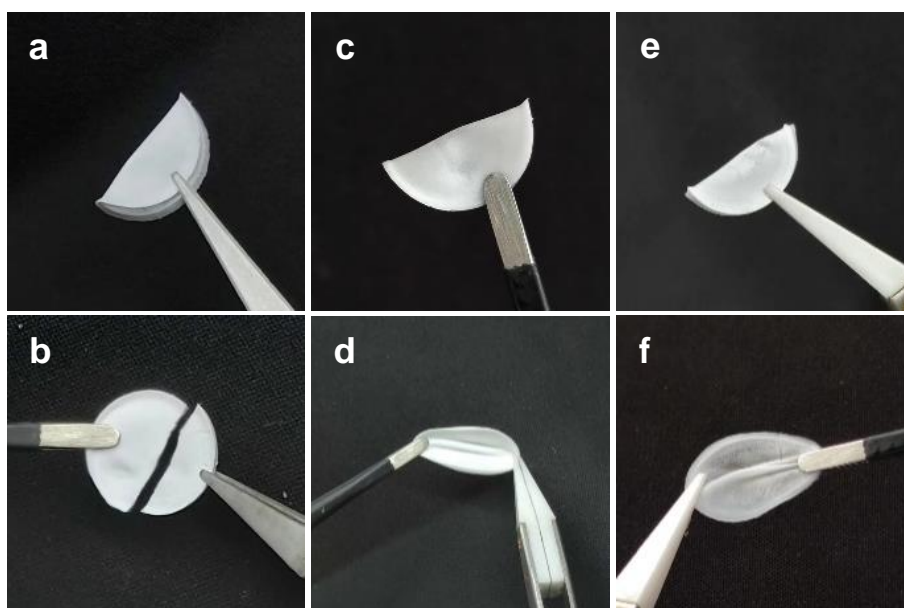

**Fig. S4** Optical photographs of PHL films after folding and stretching with different mass ratios of **a b** 1:1, **c d** 1:3 and **e f** 1:5

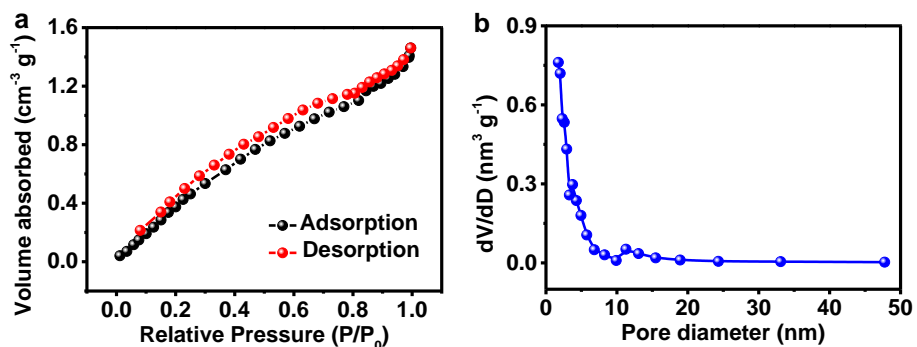

**Fig. S5** **a** N<sub>2</sub> adsorption/desorption isotherm and **b** corresponding pore size distribution of PHL

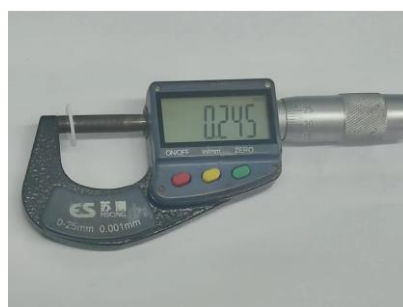

**Fig. S6** The thickness of the PHL composite layer with various mass ratio of 1:3

**Table S1** Ionic conductivity of PVDF-HFP/LiNO<sub>3</sub> composites film with various mass ratios

| Mass ratio | Area (cm <sup>2</sup> ) | Thickness (mm) | Ohmic resistance (Ω) | Ionic conductivity (S cm <sup>-1</sup> ) |
|------------|-------------------------|----------------|----------------------|------------------------------------------|
| 1:1        | 2.01                    | 0.250          | 298                  | 4.17×10 <sup>-5</sup>                    |
| 3:1        | 2.01                    | 0.245          | 36                   | 3.39×10 <sup>-4</sup>                    |
| 5:1        | 2.01                    | 0.248          | 159                  | 7.76×10 <sup>-5</sup>                    |

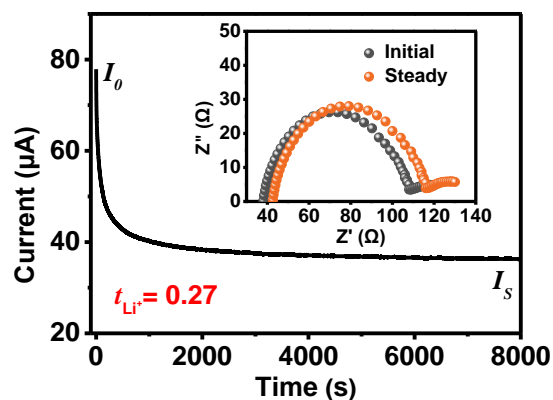

**Fig. S7** Chronoamperometric curves and corresponding EIS before/after polarization of bare Li

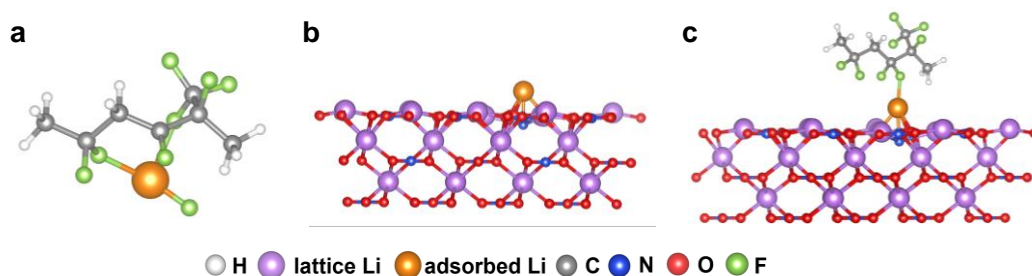

**Fig. S8** Optimized geometrical structures of Li atoms adsorbed on **a** PH, **b** LiNO<sub>3</sub>, and **c** PHL

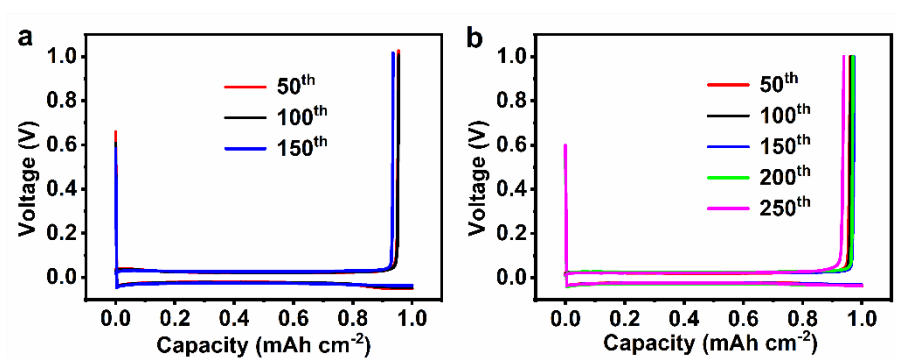

**Fig. S9** Charge/discharge curves of Li||Cu cells using **a** bare Cu and **b** PHL-Cu at 0.5 mA cm<sup>-2</sup>

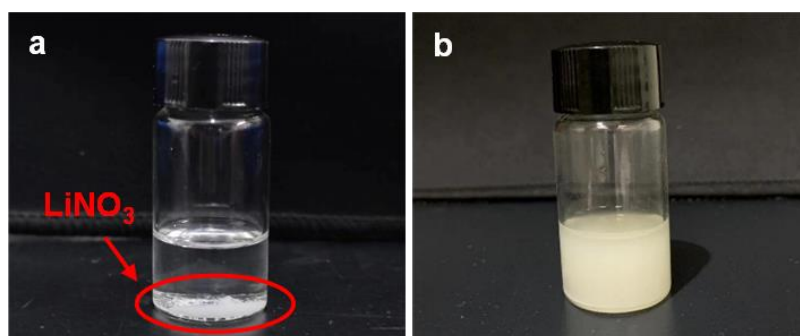

**Fig. S10** Optical photographs of LiNO<sub>3</sub> dissolution test in the ester-based electrolyte: **a** before and **b** after magnetic stirring for 12 h

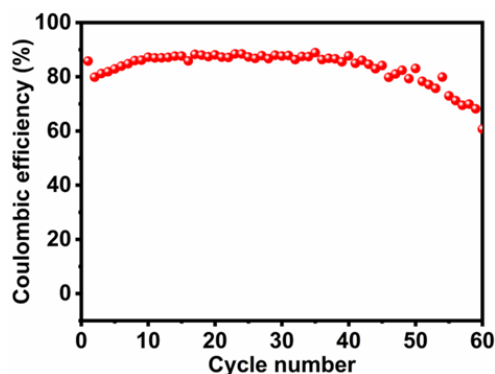

**Fig. S11** CE of Li||Cu cell using LiNO<sub>3</sub> as electrolyte additive at a current density of 1 mA cm<sup>-2</sup> under a fixed capacity of 1 mAh cm<sup>-2</sup>

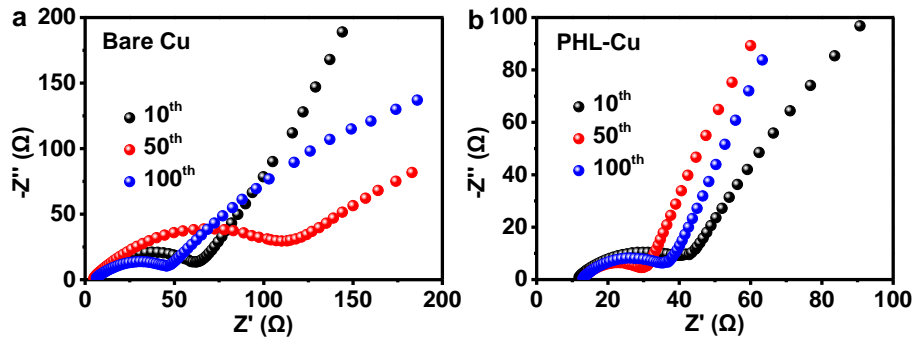

**Fig. S12** EIS plots of Li||Cu cells using **a** bare Cu and **b** PHL-Cu after different cycles at a current density of  $1 \text{ mA cm}^{-2}$  under  $1 \text{ mAh cm}^{-2}$

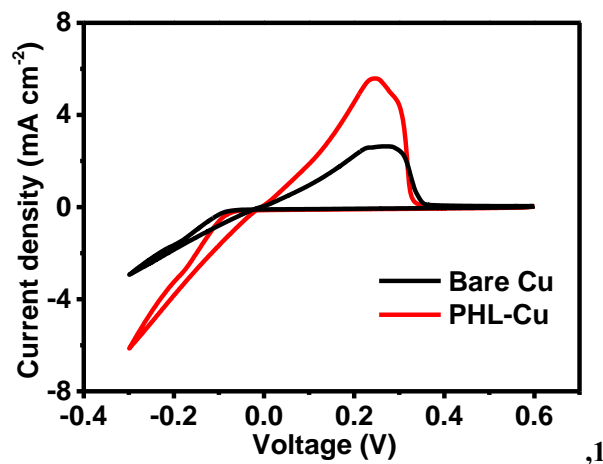

**Fig. S13** CV of Li||Cu cells using bare Cu and PHL-Cu recorded at a scan rate of  $5 \text{ mV s}^{-1}$  in a voltage range of  $-0.3\text{--}0.6 \text{ V}$

As shown in Fig. S13, the current response of the PHL-Cu electrode is greatly high than that of the bare Cu electrode during Li plating/stripping process, indicating the fast  $\text{Li}^+$  transport and reversible reaction kinetics of the Li||PHL-Cu cell.

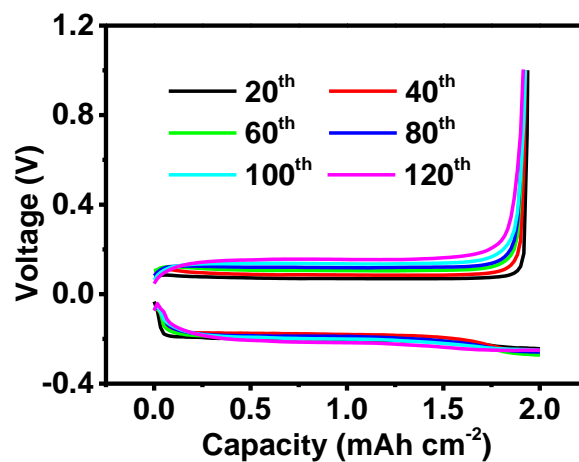

**Fig. S14** Charge/discharge curves of Li||Cu cells using PHL-Cu in particular cycles at  $2 \text{ mA cm}^{-2}$

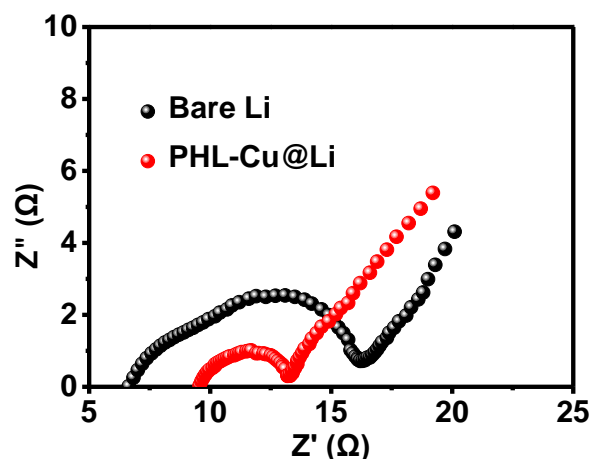

**Fig. S15** EIS of bare Li and PHL-Cu@Li anodes after 50 cycles of Li plating/stripping at  $1 \text{ mA cm}^{-2}$  to  $1 \text{ mAh cm}^{-2}$

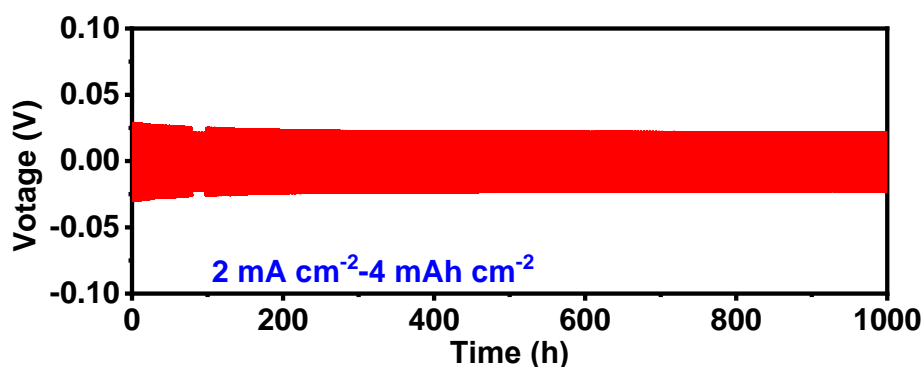

**Fig. S16** Voltage profiles of Li||Li symmetric cells with PHL-Cu@Li at  $2 \text{ mA cm}^{-2}$  under high capacity of  $4 \text{ mAh cm}^{-2}$

**Table S2** Li plating/stripping behavior of the PHL-Cu@Li anode at various current density-capacity conditions with previously reports on the  $\text{LiNO}_3$  dissolution in ester-based electrolyte

| Strategy                | Current density         | Capacity                 | Cycle time | Electrolyte                             | Ref. |
|-------------------------|-------------------------|--------------------------|------------|-----------------------------------------|------|
|                         | ( $\text{mA cm}^{-2}$ ) | ( $\text{mAh cm}^{-2}$ ) | (h)        |                                         |      |
| FEC-SL/ $\text{LiNO}_3$ | 3                       | 1                        | 200        | 1 M $\text{LiPF}_6$ in EC/DMC           | [S1] |
| MgAl-LDHs               | 0.5                     | 1                        | 500        | 1 M $\text{LiPF}_6$ in EC/DMC/DEC+5%FEC | [S2] |
| Pyridine                | 1                       | 1                        | 300        | 1 M $\text{LiPF}_6$ in EC/EMC/DMC       | [S3] |
| Tetraglyme              | 1                       | 1                        | 800        | 1 M $\text{LiPF}_6$ in EC/DMC           | [S4] |
| EB-COF: $\text{NO}_3$   | 5                       | 10                       | 300        | 1 M $\text{LiPF}_6$ in EC/EMC           | [S5] |
| IL- $\text{NO}_3^-$     | 1                       | 1                        | 600        | 1 M $\text{LiPF}_6$ in EC/DMC/EMC       | [S6] |
| TEAN                    | 1                       | 1                        | 1100       | 1 M $\text{LiPF}_6$ in EC/DEC+10% FEC   | [S7] |

|         |     |     |      |                                              |             |
|---------|-----|-----|------|----------------------------------------------|-------------|
| LNO-PVC | 2   | 1   | 300  | 1 M LiPF <sub>6</sub> in EC/DMC<br>+5%FEC    | [S8]        |
| LN-CPL  | 0.5 | 0.5 | 300  | 1.15 M LiPF <sub>6</sub> in EC/EMC           | [S9]        |
| LNO@MOF | 1   | 1   | 1000 | 1 M LiPF <sub>6</sub> in EC/DEC              | [S10]       |
|         | 1   | 1   | 3000 |                                              |             |
|         | 3   | 1   | 2000 |                                              |             |
| PHL     | 5   | 1   | 1000 | 1 M LiPF <sub>6</sub> in<br>EC/DMC/EMC+5%FEC | Our<br>work |
|         | 3   | 3   | 2000 |                                              |             |
|         | 2   | 4   | 800  |                                              |             |

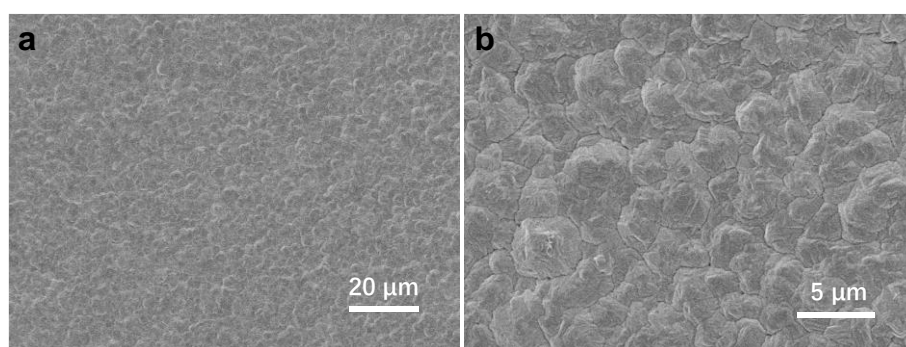

**Fig. S17** SEM image of bare Cu electrode under different magnification

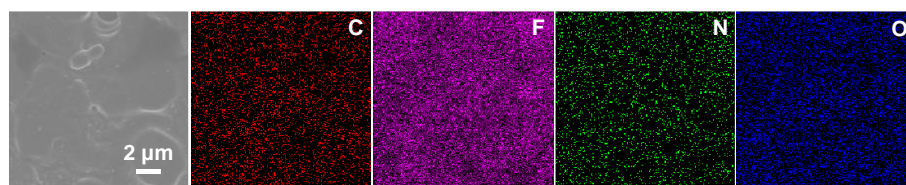

**Fig. S18** SEM images of PHL-Cu electrode and corresponding EDS mappings in Li||Cu cells after 50 cycles

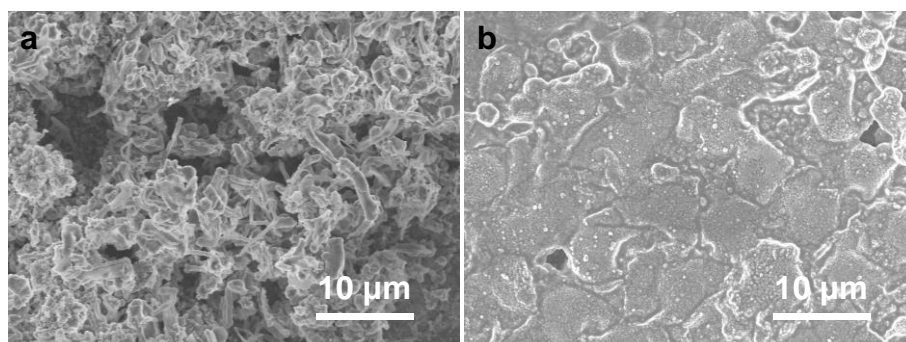

**Fig. S19** SEM images of Li||Cu cells using **a** bare Cu and **b** PHL-Cu after 100 cycles

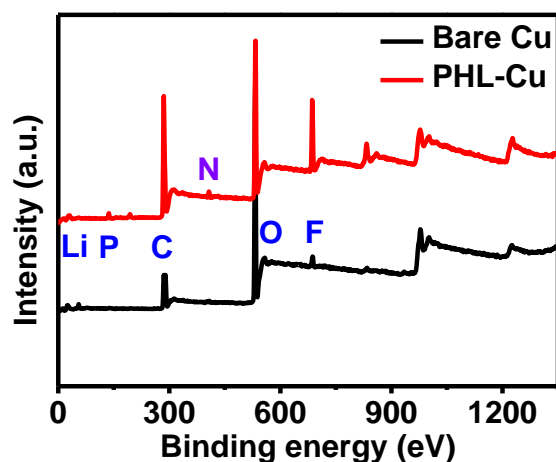

**Fig. S20** Survey XPS spectra of bare Cu and PHL-Cu electrodes after 10 cycles in Li||Cu cells

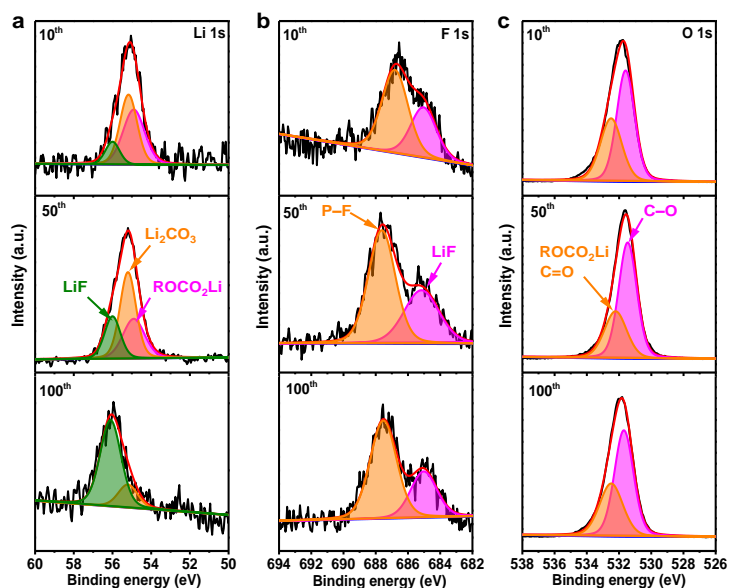

**Fig. S21** XPS characterization of the SEI films for the bare Cu electrodes after different cycles in Li||Cu cells: **a** Li 1s, **b** F 1s and **c** O 1s

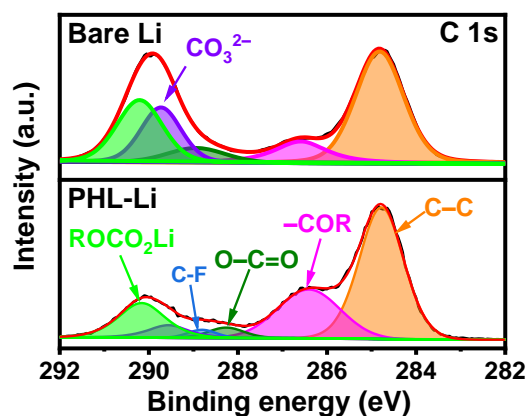

**Fig. S22** Comparison of high-resolution XPS spectra of C 1s for bare Cu and PHL-Cu electrodes after 100 cycles



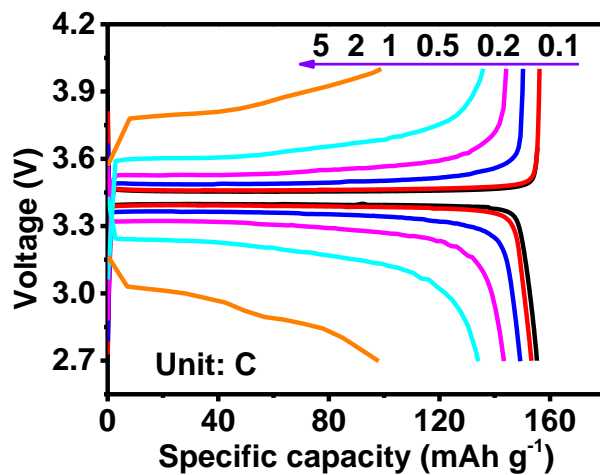

Fig. S23 The charge/discharge profiles of the PHL-Cu@Li||LFP cell at different C-rate

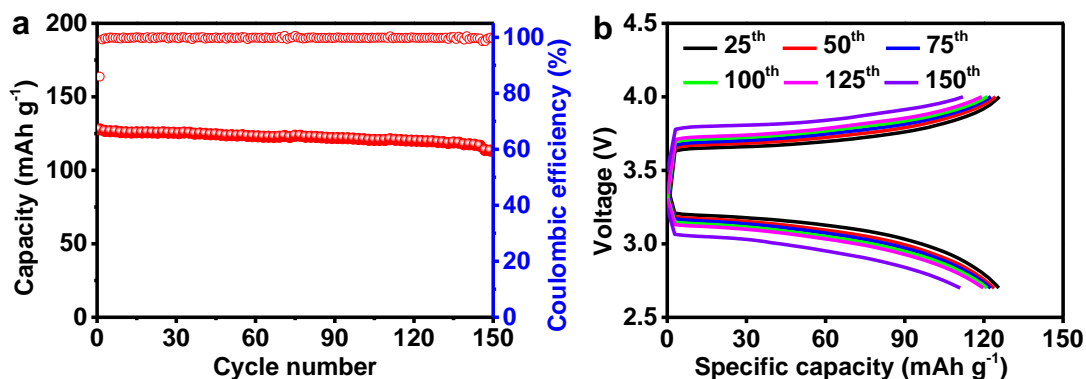

Fig. S24 a Cycle performance and b corresponding charge/discharge profiles at particular cycles of the PHL-Cu@Li||LFP cell at 2C

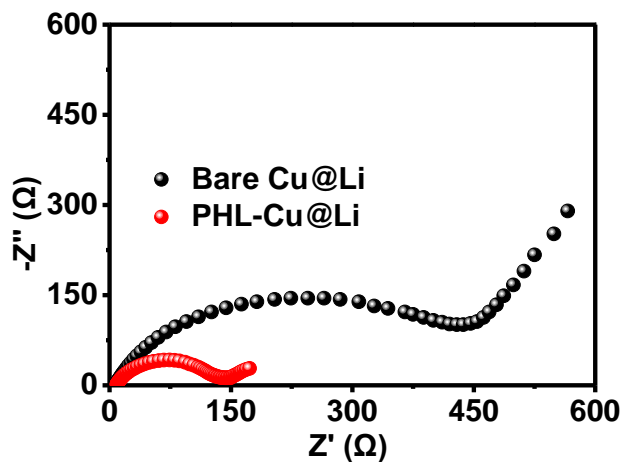

Fig. S25 EIS of the Li||LFP cells with bare Cu@Li and PHL-Cu@Li after rate capability test

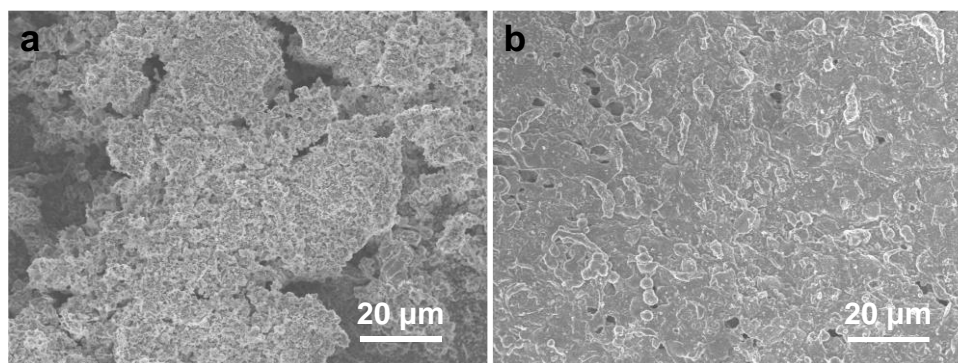

**Fig. S26** SEM images of the **a** bare Cu@Li and **b** PHL-Cu@Li electrodes after 100 cycles in Li||LFP full cell

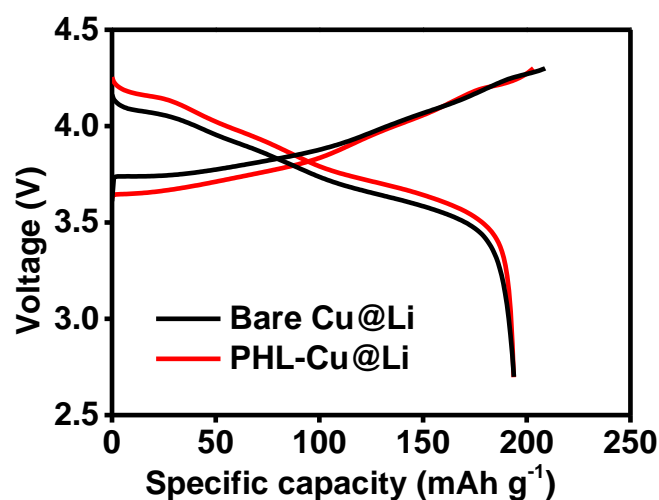

**Fig. S27** Initial charge/discharge profiles of the PHL-Cu@Li||NCM cell at 0.5C

**Table S3** Summary of cycling performance of LMBs with low N/P ratios and Li utilization efficiency in literature

| Cathode | N/P ratio | Cycle number | Capacity retention | Rate density | Li utilization efficiency | Refs. |
|---------|-----------|--------------|--------------------|--------------|---------------------------|-------|
| LFP     | 8.5       | 800          | 91.7%              | 2 C          | 11.76%                    | [S11] |
| LFP     | 5.1       | 450          | 82%                | 0.5 C        | 19.61%                    | [S12] |
| NCM811  | 6.7       | 300          | 80%                | C/3          | 14.93%                    | [S13] |
| LCO     | 3.3       | 240          | 90%                | 0.2 C/0.5 C  | 30.30%                    | [S10] |
| LFP     | >20       | 500          | 93%                | 2 C          | <5%                       | [S14] |
| LFP     | >20       | 1000         | 92%                | 1 C          | <5%                       | [S15] |
| NCM811  | >20       | 500          | 75%                | 0.5 C        | <5%                       | [S15] |
| LFP     | >20       | 400          | 80%                | 0.5 C        | <5%                       | [S16] |
| NCA     | 2.3       | 60           | 69.7%              | 0.3 C        | 43.48%                    | [S17] |
| NCM811  | 2.64      | 200          | 87.5%              | 0.3 C        | 37.88%                    | [S18] |
| LFP     | 8.6       | 300          | 85%                | 1 C          | 11.63%                    | [S19] |
| LNCM    | 5         | 50           | 87.6%              | 1 C          | 20%                       | [S20] |

|        |      |     |       |       |         |       |
|--------|------|-----|-------|-------|---------|-------|
| NCM811 | 1.36 | 100 | 81.3% | 1 C   | 73.53%  | [S21] |
| LFP    | 9.8  | 900 | 97%   | 0.5 C | 10.20%  | Our   |
| NCM87  | 0.83 | 100 | 85%   | 0.5 C | 120.48% | work  |

## Supplementary References

- [S1] N. Piao, S. Liu, B. Zhang, X. Ji, X. Fan et al., Lithium metal batteries enabled by synergetic additives in commercial carbonate electrolytes. *ACS Energy Lett.* **6**, 1839–1848 (2021). <https://doi.org/10.1021/acsenergylett.1c00365>
- [S2] F. Wang, Z. Wen, Z. Zheng, W. Fang, L. Chen et al., Memory effect of MgAl layered double hydroxides promotes LiNO<sub>3</sub> dissolution for stable lithium metal anode. *Adv. Energy Mater.* **13**, 2203830 (2023). <https://doi.org/10.1002/aenm.202203830>
- [S3] D. Liu, X. Xiong, Q. Liang, X. Wu, H. Fu, An inorganic-rich SEI induced by LiNO<sub>3</sub> additive for a stable lithium metal anode in carbonate electrolyte. *Chem. Commun.* **57**, 9232–9235 (2021). <https://doi.org/10.1039/D1CC03676A>
- [S4] D. Xiao, Q. Li, D. Luo, G. Li, H. Liu et al., Regulating the Li<sup>+</sup>-solvation structure of ester electrolyte for high-energy-density lithium metal batteries. *Small* **16**, e2004688 (2020). <https://doi.org/10.1002/smll.202004688>
- [S5] Y. Wen, J. Ding, Y. Yang, X. Lan, J. Liu et al., Introducing NO<sub>3</sub><sup>-</sup> into carbonate-based electrolytes via covalent organic framework to incubate stable interface for Li-metal batteries. *Adv. Funct. Mater.* **32**, 2109377 (2022). <https://doi.org/10.1002/adfm.202109377>
- [S6] X. Ma, J. Yu, X. Zou, Y. Hu, M. Yang et al., Single additive to regulate lithium-ion solvation structure in carbonate electrolytes for high-performance lithium-metal batteries. *Cell Rep. Phys. Sci.* **4**, 101379 (2023). <https://doi.org/10.1016/j.xcrp.2023.101379>
- [S7] Z. Guo, X. Song, Q. Zhang, N. Zhan, Z. Hou et al., Cationic size effect promoting dissolution of nitrate anion in ester electrolyte for lithium–metal batteries. *ACS Energy Lett.* **7**, 569–576 (2022). <https://doi.org/10.1021/acsenergylett.1c02495>
- [S8] H. Yang, Q. Liu, Y. Wang, Z. Ma, P. Tang et al., An interlayer containing dissociated LiNO<sub>3</sub> with fast release speed for stable lithium metal batteries with 400 wh kg<sup>-1</sup> energy density. *Small* **18**, e2202349 (2022). <https://doi.org/10.1002/smll.202202349>
- [S9] J.-T. Kim, I. Phiri, S.-Y. Ryou, Incorporation of embedded protective layers to circumvent the low LiNO<sub>3</sub> solubility problem and enhance Li metal anode cycling performance. *ACS Appl. Energy Mater.* **6**, 2311–2319 (2023). <https://doi.org/10.1021/acsaem.2c03511>

- [S10] Q. Liu, Y. Xu, J. Wang, B. Zhao, Z. Li et al., Sustained-release nanocapsules enable long-lasting stabilization of Li anode for practical Li-metal batteries. *Nanomicro Lett.* **12**, 176 (2020). <https://doi.org/10.1007/s40820-020-00514-1>
- [S11] D. Huang, C. Zeng, M. Liu, X. Chen, Y. Li et al., Introducing KI as a functional electrolyte additive to stabilize Li metal anode. *Chem. Eng. J.* **454**, 140395 (2023). <https://doi.org/10.1016/j.cej.2022.140395>
- [S12] Z. Jiang, C. Li, J. Mo, H. Yang, H.-W. Li et al., A cation-anion synergetic additive achieving long-term stability of lithium metal anode. *Chem. Eng. J.* **451**, 138580 (2023). <https://doi.org/10.1016/j.cej.2022.138580>
- [S13] X. Cao, X. Ren, L. Zou, M.H. Engelhard, W. Huang et al., Monolithic solid–electrolyte interphases formed in fluorinated orthoformate-based electrolytes minimize Li depletion and pulverization. *Nat. Energy* **4**, 796–805 (2019). <https://doi.org/10.1038/s41560-019-0464-5>
- [S14] Z. Hu, S. Zhang, S. Dong, W. Li, H. Li et al., Poly(ethyl  $\alpha$ -cyanoacrylate)-based artificial solid electrolyte interphase layer for enhanced interface stability of Li metal anodes. *Chem. Mater.* **29**, 4682–4689 (2017). <https://doi.org/10.1021/acs.chemmater.7b00091>
- [S15] Z. Cheng, Y. Chen, L. Shi, M. Wu, Z. Wen, Long-lifespan lithium metal batteries enabled by a hybrid artificial solid electrolyte interface layer. *ACS Appl. Mater. Interfaces* **15**, 10585–10592 (2023). <https://doi.org/10.1021/acsami.2c18224>
- [S16] C. Yan, Y.-X. Yao, X. Chen, X.-B. Cheng, X.-Q. Zhang et al., Lithium nitrate solvation chemistry in carbonate electrolyte sustains high-voltage lithium metal batteries. *Angew. Chem. Int. Ed Engl.* **57**, 14055–14059 (2018). <https://doi.org/10.1002/anie.201807034>
- [S17] Y. Liu, X. Qin, D. Zhou, H. Xia, S. Zhang et al., A biscuit-like separator enabling high performance lithium batteries by continuous and protected releasing of NO<sub>3</sub><sup>-</sup> in carbonate electrolyte. *Energy Storage Mater.* **24**, 229–236 (2020). <https://doi.org/10.1016/j.ensm.2019.08.016>
- [S18] W. Zhang, Q. Wu, J. Huang, L. Fan, Z. Shen et al., Colossal granular lithium deposits enabled by the grain-coarsening effect for high-efficiency lithium metal full batteries. *Adv. Mater.* **32**, e2001740 (2020). <https://doi.org/10.1002/adma.202001740>
- [S19] Y. Cui, S. Liu, D. Wang, X. Wang, X. Xia et al., A facile way to construct stable and ionic conductive lithium sulfide nanoparticles composed solid electrolyte interphase on Li metal anode. *Adv. Funct. Mater.* **31**, 2006380 (2021). <https://doi.org/10.1002/adfm.202006380>
- [S20] X. Yan, L. Lin, X. Han, Z. Qiao, Q. Xie et al., Li dendrites inhibition realized by lithiophilic and ion/electron conductive 3D skeleton for Li metal anodes. *Chem. Eng. J.* **421**, 127872 (2021). <https://doi.org/10.1016/j.cej.2020.127872>

- [S21] S. Cui, P. Zhai, W. Yang, Y. Wei, J. Xiao et al., Large-scale modification of commercial copper foil with lithiophilic metal layer for Li metal battery. *Small* **16**, e1905620 (2020). <https://doi.org/10.1002/sml.201905620>
